# Supplementary material for: Food profiling using innovative voltammetric metallic-glassy carbon electrodes evaluated by clustering metrics
Source: Research Square preprint supplement (doi:10.21203/rs.3.rs-2318649/v1), 2022-12-02
Supplement: Supplementary file 1 [file 82dec8c5f04887f417bdd641.docx]

**Food profiling using innovative voltammetric metallic-glassy carbon electrodes evaluated by clustering metrics**

Szymon WÓJCIK a, Valentin MIRCESKI b,c,d, Bogusław BAŚ a, Małgorzata JAKUBOWSKA a[[1]](#footnote-1)*

*a AGH University of Science and Technology, Faculty of Materials Science and Ceramics,
30-059 Kraków, al. Mickiewicza 30, Poland*

*b Department of Inorganic and Analytical Chemistry, University of Lodz, Tamka 12, 91-403 Lodz, Poland*

*c Institute of Chemistry, Faculty of Natural Sciences and Mathematics, “Ss Cyril and Methodius” University, P.O. Box 162, Skopje, North Macedonia*

*d Research Center for Environment and Materials, Macedonian Academy of Sciences and Arts, Bul. Krste Misirkov 2, Skopje, North Macedonia*

**Fig. S1.** Comparison of the signals recorded in the overall SW cathodic potential direction sampled with the current sampling frequency of 1 kHz, directly measured current samples: a) compilation for three different electrodes for the **yellow** isotonic drink, b) enlarged fragment of a), c) compilation for the tested isotonic drinks obtained on the **qDIrPt** electrode, d) enlarged fragment of c). Potential window: -1000 to 1000 mV.

**Fig. S2.** Net-voltammograms recorded in cathodic potential direction on the qDPtGCE for three dyes dissolved in a white isotonic drink: a) interpretation using the SWV technique, b) interpretation using the DSSWV technique. The concentration of each dye is: 0.01 gL-1.

**Fig. S3.** Net-SWV signals recorded in cathodic potential direction for individual isotonic drinks (data for profiling), recorded on the electrodes: a) qDPtGC, b) qDIrGC, c) qDIrPt.

**Fig. S4.** Net-DSSWV signals recorded in cathodic potential direction for individual isotonic drinks (data for profiling), recorded on the electrodes: a) qDPtGC, b) qDIrGC, c) qDIrPt.

**Fig. S5.** Silhouette indices for all 12 datasets considered, assuming k = 5. The arrows indicate those datasets for which each of the coefficients indicated that the optimal value of *k* for k-means is 5 (A - anodic scan, C - cathodic scan).


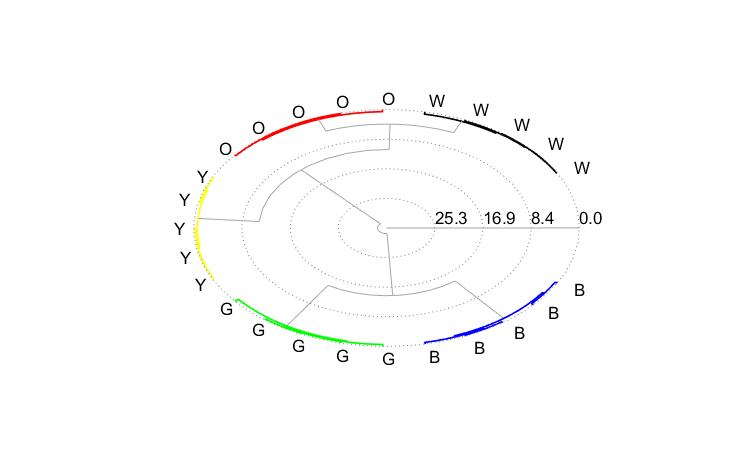


**Fig. S6.** Polar dendrogram for the best experimental variant, i.e. for cathodic waveforms recorded with qDIrPtE, using the DSSWV technique.

1. *Corresponding autor [↑](#footnote-ref-1)
